# Supplementary material for: A Simple Graphical Method to Determine the Order in Catalyst
Source: PubMed Central journal article supplement (PMC4797368; doi:10.1002/anie.201508983), 2016-01-08
Supplement: ANIE-55-2028-s001.pdf [file ANIE-55-2028-s001.pdf]

Supporting Information

**A Simple Graphical Method to Determine the Order of a Reaction in Catalyst**

*Jordi Burés\**

anie\_201508983\_sm\_miscellaneous\_information.pdf

## Supporting Information

### Table of Contents:

|                                                                         |      |
|-------------------------------------------------------------------------|------|
| 1. General Procedures                                                   | S-2  |
| 2. Integration of the general rate law equation of a catalytic reaction | S-2  |
| 3. Adjusted normalized time scale method                                | S-2  |
| 4. Figure 2                                                             | S-3  |
| 5. Figure 3                                                             | S-4  |
| 6. Figure 4a                                                            | S-4  |
| 7. Figure 4b                                                            | S-6  |
| 8. Numerical data                                                       | S-7  |
| 8.1. Figure 2a                                                          | S-7  |
| 8.2. Figure 2b                                                          | S-12 |
| 8.3. Figure 2c                                                          | S-12 |
| 8.4. Figure 3                                                           | S-17 |
| 8.5. Figure 4b                                                          | S-18 |

## 1. General Procedures

All the figures have been generated by simulating catalytic reactions with a deterministic method LSODA using COPASI and introducing a random error with a normal distribution with Microsoft Excel. The conditions used for the simulation of each catalytic cycle of the manuscript (including the catalytic cycle, the initial concentrations of substances, and the kinetic constant) are detailed below. Also, the resulting exact numerical values used to plot the figures are provided in section "7. Numerical Data" at the end of this supporting information.

## 2. Integration of the general rate law equation of a catalytic reaction

The normalized time scale method is theoretically based on the fact that catalyst concentration is not a thermodynamic driving force of the reaction and therefore is constant during the reaction. Integration of the general rate law equation of a catalytic reaction shows how  $t[\text{cat}]_T^n$  becomes one of the parameters of the function that describes the concentration of a reagent at each time point.

$$-\frac{d[A]}{dt} = f([A], [B], \text{kinetic const.}) \cdot [\text{cat}]_T^n$$
$$\int_{[A]_0}^{[A]_t} f^{-1}([A], [B], \text{kinetic const.}) d[A] = \int_0^t -[\text{cat}]_T^n dt$$
$$F^{-1}([A]_t, [A]_0, [B]_0, \nu_A, \nu_B, \text{kinetic const.}) = -t[\text{cat}]_T^n$$
$$[A]_t = G([A]_0, [B]_0, \nu_A, \nu_B, \text{kinetic const.}, t[\text{cat}]_T^n)$$

## 3. Adjusted normalized time scale method

The normalized time scale analysis complements another method for investigating catalyst stability and product inhibition by direct comparison of concentration profiles. Blackmond used a time adjustment to compare reaction profiles of same excess experiments (ref. 1b of the manuscript). The profile curve of the reaction with the lowest initial concentration of reactants has to be shifted by the same amount of time that takes the reaction with the highest initial concentration to achieve the initial concentration of the first one. Both methods, the time adjustment and the time scale, can be simultaneously used to compare same excess experiments with different catalyst loadings. To do so, it is necessary to use the normalized time adjustment, where the standard time adjustment is scaled by the catalyst loading of the reaction with the highest initial concentrations of reactants. The figure below shows the procedure to determine the order in catalyst with two experiments with different catalyst loadings (0.01 M and 0.05 M) and different initial concentration of reactants ( $[A]$ : 1.0 M and 0.7 M), but the same excess ( $[\text{excess}] = [B]_0 - \nu_B/\nu_A [A]_0 = 0.3 \text{ M}$ ). The trace for experiment B has to be shifted 0.25 h (the standard time adjustment) multiplied by 0.01 (the total concentration of catalyst for

experiment A) to the power of the order in catalyst. By applying this factor to the time adjustment, the trace starting at the lowest concentration will be shifted to the correct normalized time point. Then the process to find out the order in catalyst is identical to the one previously described.

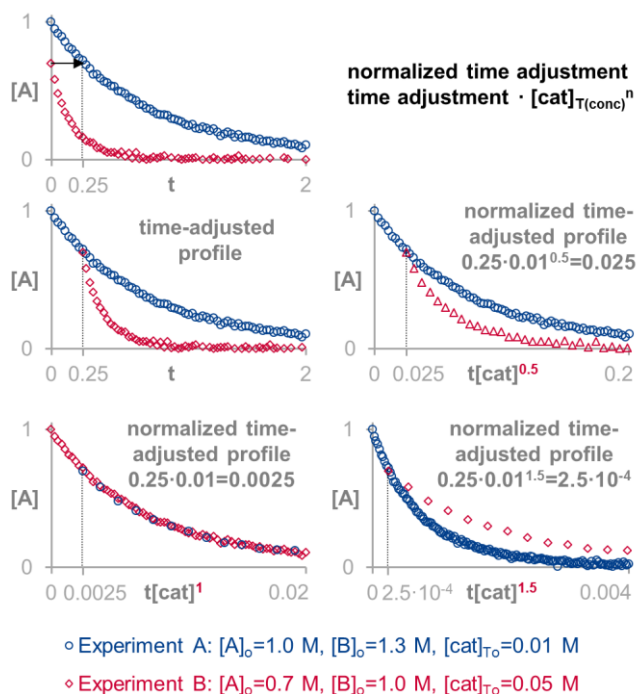

#### 4. Figure 2

The values of concentration and kinetic constants used to simulate figure 2 are shown below.

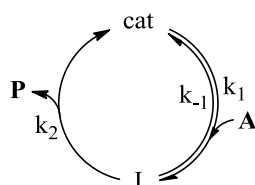

$$[A]_0 = 1.0 \text{ M};$$

$$k_1 = 0.1 \text{ M}^{-1} \text{ s}^{-1}; k_{-1} = 0.1 \text{ s}^{-1}; k_2 = 0.1 \text{ s}^{-1}$$

The simulated concentration results were obtained after applying an error with a normal distribution with a standard deviation of 0.01 for figure 2a and 2b and a standard deviation of 0.05 for figure 2c and are listed in sections 7.1 (Figure 2a), 7.2 (Figure 2b) and 7.3 (Figure 2c) of this supporting information.

## 5. Figure 3

The values of concentrations and kinetic constants used to simulate figure 3 are shown below.

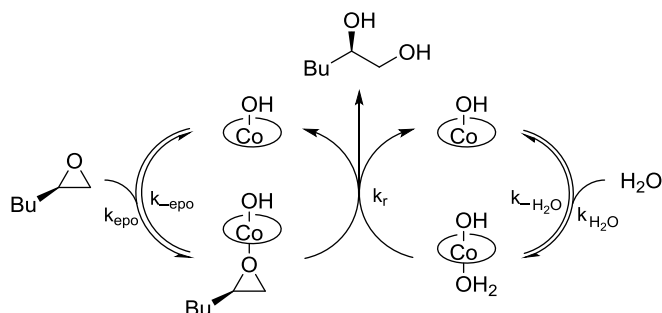

$$[\text{H}_2\text{O}]_0 = 3.63 \text{ M}; [\text{epoxide}]_0 = 6.19 \text{ M}$$

$$k_{\text{epo}} = 10^6 \text{ M}^{-1}\text{s}^{-1}; k_{-\text{epo}} = 8.4890 \cdot 10^6 \text{ s}^{-1}; k_{\text{H}_2\text{O}} = 10^6 \text{ M}^{-1}\text{s}^{-1}; k_{-\text{H}_2\text{O}} = 5.5556 \cdot 10^6 \text{ s}^{-1}; k_r = 17.88 \text{ M}^{-1}\text{s}^{-1}$$

The simulated concentration results against time for the different concentrations of catalyst (0.0308 M, 0.85 mol%; 0.02185 M, 0.60 mol%; 0.0155 M, 0.43 mol%) are in section 7.4 of this supporting information.

## 6. Figure 4a

The order in catalyst for the catalytic cycle shown in Figure 4 of the manuscript depends on the kinetic constants of the catalytic cycle, the thermodynamic constant of the out-cycle dimerization equilibrium and the concentration of the substrates. The theoretical value of order in catalyst for each set of data is obtained using the normalized sensitivity analysis of the rate law assuming steady-state conditions.

The Bodenstein steady-state approximation is applied to the catalytic cycle and the quasi-equilibrium assumption to the out-cycle equilibrium. The rate law for the reaction (equation 5) is derived using these three equations (equations 1, 2 and 3) and the mass balance (equation 4) for the catalytic species. The notation has been simplified as shown below.

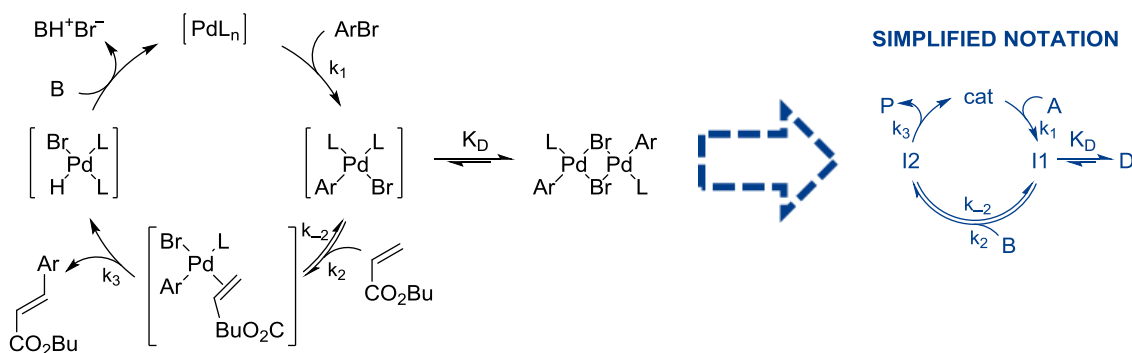

$$\text{Steady-state approximation: } \frac{d[\text{cat}]}{dt} = k_3[\text{I2}] - k_1[\text{A}][\text{cat}] \approx 0 \quad (1)$$

$$\text{Steady-state approximation: } \frac{d[\text{I2}]}{dt} = k_2[\text{B}][\text{I1}] - (k_3 + k_{-2})[\text{I2}] \approx 0 \quad (2)$$

$$\text{Quasi-equilibrium assumption: } K_D = \frac{[\text{D}]}{[\text{I1}]^2} \quad (3)$$

$$\text{Mass Balance of catalytic species: } [\text{Pd}]_T = [\text{cat}] + [\text{I1}] + [\text{I2}] + 2[\text{D}] \quad (4)$$

$$\text{Rate law: } \frac{d[\text{P}]}{dt} = \frac{2k_3[\text{Pd}]_T}{b + \sqrt{b^2 + 4a[\text{Pd}]_T}} \quad (5)$$

$$\text{Where } a = 2K_D \left( \frac{k_3 + k_{-2}}{k_2[\text{B}]} \right)^2 \text{ and } b = \frac{k_2k_3[\text{B}] + k_1(k_3 + k_{-2})[\text{A}] + k_1k_2[\text{A}][\text{B}]}{k_1k_2[\text{A}][\text{B}]} \quad (6)$$

The normalized sensitivity is used as the equation for the order in catalyst (equation 7):

$$\text{order of the reaction in } [\text{Pd}]_T = \frac{\frac{dr}{r}}{\frac{d[\text{Pd}]_T}{[\text{Pd}]_T}} = \frac{b + \sqrt{b^2 + 4a[\text{Pd}]_T}}{2\sqrt{b^2 + 4a[\text{Pd}]_T}} \quad (7)$$

The plot of equation 7 using the initial concentration values for the model is shown below:

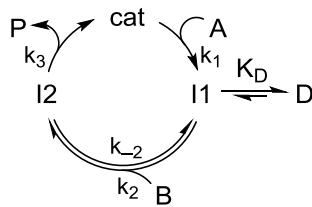

$$k_1 = 363 \text{ M}^{-1}\text{h}^{-1}; k_2 = 34.2 \text{ M}^{-1}\text{h}^{-1}; k_{-2} = 114 \text{ h}^{-1}$$

$$k_3 = 374 \text{ h}^{-1}; K_D = 9990 \text{ M}^{-1}$$

$$[\text{A}]_0 = 0.20 \text{ M}; [\text{B}]_0 = 0.28 \text{ M}$$

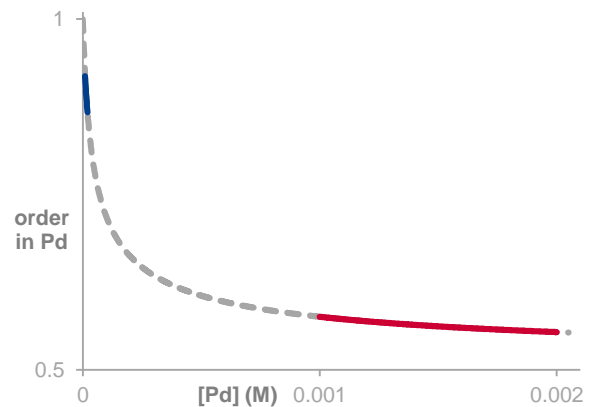

For the range of concentrations of catalyst analyzed in the manuscript ( $10^{-5}$  to  $2 \cdot 10^{-5}$  M and  $10^{-3}$  to  $2 \cdot 10^{-3}$  M), the order in catalyst would vary during the course of the reaction. The average values of the order in catalyst at different stages of the reaction are shown below.

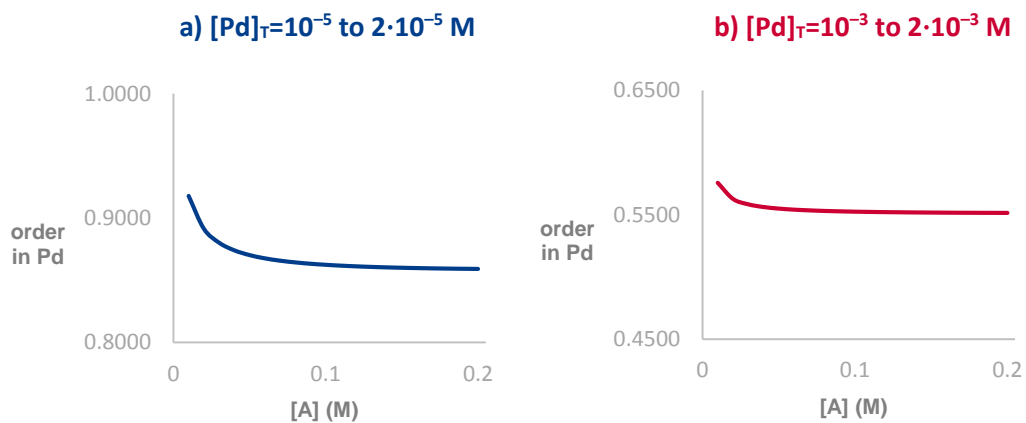

### 7. Figure 4b

The values of concentrations and kinetic constants used to simulate figure 3 are shown below.

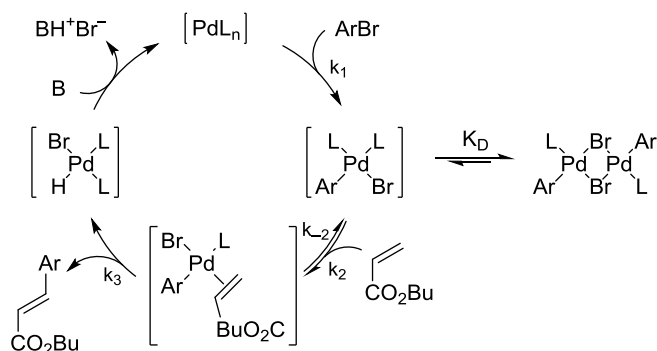

$$[A]_0 = 0.20 \text{ M}; [B]_0 = 0.28 \text{ M}$$

$$k_1 = 363 \text{ M}^{-1}\text{h}^{-1}; k_2 = 34.2 \text{ M}^{-1}\text{h}^{-1}; k_{-2} = 114 \text{ h}^{-1}; k_3 = 374 \text{ h}^{-1}; K_D = 9990 \text{ M}^{-1}$$

The simulated concentration results against time for the different concentrations of catalyst ( $10^{-5}$  M,  $5 \cdot 10^{-3}$  mol%;  $1.5 \cdot 10^{-5}$  M,  $7.5 \cdot 10^{-3}$  mol%;  $2 \cdot 10^{-5}$  M, 0.01 mol%;  $10^{-3}$  M, 0.5 mol%;  $1.5 \cdot 10^{-3}$  M, 0.75 mol%;  $2 \cdot 10^{-3}$  M, 1 mol%) are in the section 7.5 of this supporting information.

## 8. Numerical data

### 8.1. Figure 2a

| time (h) | [A] (M)<br>([cat] <sub>0</sub> = 0.05 M) | [A] (M)<br>([cat] <sub>0</sub> = 0.02 M) | [A] (M)<br>([cat] <sub>0</sub> = 0.01 M) | [A] (M)<br>([cat] <sub>0</sub> = 0.005 M) |
|----------|------------------------------------------|------------------------------------------|------------------------------------------|-------------------------------------------|
| 0.00     | 1.013                                    | 1.003                                    | 1.015                                    | 1.001                                     |
| 0.03     | 0.847                                    | 0.929                                    | 0.981                                    | 0.979                                     |
| 0.06     | 0.681                                    | 0.866                                    | 0.922                                    | 0.968                                     |
| 0.08     | 0.586                                    | 0.809                                    | 0.895                                    | 0.928                                     |
| 0.11     | 0.476                                    | 0.752                                    | 0.863                                    | 0.935                                     |
| 0.14     | 0.379                                    | 0.703                                    | 0.850                                    | 0.940                                     |
| 0.17     | 0.320                                    | 0.649                                    | 0.812                                    | 0.909                                     |
| 0.19     | 0.251                                    | 0.603                                    | 0.788                                    | 0.892                                     |
| 0.22     | 0.201                                    | 0.557                                    | 0.742                                    | 0.858                                     |
| 0.25     | 0.146                                    | 0.509                                    | 0.737                                    | 0.842                                     |
| 0.28     | 0.124                                    | 0.483                                    | 0.711                                    | 0.824                                     |
| 0.31     | 0.102                                    | 0.438                                    | 0.670                                    | 0.839                                     |
| 0.33     | 0.084                                    | 0.391                                    | 0.659                                    | 0.812                                     |
| 0.36     | 0.056                                    | 0.374                                    | 0.621                                    | 0.799                                     |
| 0.39     | 0.036                                    | 0.324                                    | 0.599                                    | 0.787                                     |
| 0.42     | 0.037                                    | 0.316                                    | 0.580                                    | 0.771                                     |
| 0.44     | 0.038                                    | 0.301                                    | 0.569                                    | 0.765                                     |
| 0.47     | 0.016                                    | 0.273                                    | 0.540                                    | 0.724                                     |
| 0.50     | 0.026                                    | 0.231                                    | 0.527                                    | 0.715                                     |
| 0.53     | 0.003                                    | 0.229                                    | 0.496                                    | 0.721                                     |
| 0.56     | 0.034                                    | 0.204                                    | 0.483                                    | 0.701                                     |
| 0.58     | 0.004                                    | 0.172                                    | 0.447                                    | 0.679                                     |
| 0.61     | 0.003                                    | 0.169                                    | 0.437                                    | 0.683                                     |
| 0.64     | 0.031                                    | 0.159                                    | 0.417                                    | 0.681                                     |
| 0.67     | 0.007                                    | 0.144                                    | 0.416                                    | 0.657                                     |
| 0.69     | 0.009                                    | 0.122                                    | 0.379                                    | 0.650                                     |
| 0.72     | 0.002                                    | 0.112                                    | 0.372                                    | 0.612                                     |
| 0.75     | -0.003                                   | 0.110                                    | 0.364                                    | 0.607                                     |
| 0.78     | -0.012                                   | 0.108                                    | 0.345                                    | 0.596                                     |
| 0.81     | 0.003                                    | 0.092                                    | 0.337                                    | 0.620                                     |
| 0.83     | -0.018                                   | 0.075                                    | 0.307                                    | 0.574                                     |
| 0.86     | -0.005                                   | 0.079                                    | 0.326                                    | 0.559                                     |
| 0.89     | -0.006                                   | 0.073                                    | 0.293                                    | 0.578                                     |
| 0.92     | -0.017                                   | 0.047                                    | 0.283                                    | 0.553                                     |
| 0.94     | 0.002                                    | 0.053                                    | 0.270                                    | 0.534                                     |
| 0.97     | -0.009                                   | 0.053                                    | 0.236                                    | 0.521                                     |
| 1.00     | 0.004                                    | 0.042                                    | 0.237                                    | 0.513                                     |
| 1.03     | -0.008                                   | 0.057                                    | 0.246                                    | 0.512                                     |
| 1.06     | 0.026                                    | 0.041                                    | 0.218                                    | 0.493                                     |
| 1.08     | -0.006                                   | 0.028                                    | 0.218                                    | 0.476                                     |
| 1.11     | 0.009                                    | 0.010                                    | 0.191                                    | 0.473                                     |
| 1.14     | -0.014                                   | 0.033                                    | 0.194                                    | 0.457                                     |
| 1.17     | 0.006                                    | 0.017                                    | 0.188                                    | 0.454                                     |
| 1.19     | 0.010                                    | 0.026                                    | 0.173                                    | 0.459                                     |



|      |        |        |        |       |
|------|--------|--------|--------|-------|
| 1.22 | 0.014  | 0.015  | 0.175  | 0.443 |
| 1.25 | 0.014  | 0.013  | 0.160  | 0.431 |
| 1.28 | 0.002  | 0.020  | 0.148  | 0.406 |
| 1.31 | 0.004  | 0.021  | 0.150  | 0.418 |
| 1.33 | 0.000  | 0.016  | 0.146  | 0.410 |
| 1.36 | -0.002 | 0.001  | 0.129  | 0.384 |
| 1.39 | 0.009  | 0.010  | 0.116  | 0.397 |
| 1.42 | -0.010 | 0.006  | 0.107  | 0.378 |
| 1.44 | 0.007  | 0.026  | 0.117  | 0.369 |
| 1.47 | 0.012  | 0.019  | 0.097  | 0.369 |
| 1.50 | 0.006  | 0.005  | 0.099  | 0.365 |
| 1.53 | -0.008 | 0.008  | 0.105  | 0.344 |
| 1.56 | -0.012 | 0.002  | 0.099  | 0.359 |
| 1.58 | -0.009 | 0.002  | 0.080  | 0.332 |
| 1.61 | 0.009  | 0.008  | 0.087  | 0.319 |
| 1.64 | -0.008 | 0.010  | 0.079  | 0.323 |
| 1.67 | 0.001  | -0.019 | 0.076  | 0.305 |
| 1.69 | 0.008  | 0.006  | 0.071  | 0.320 |
| 1.72 | -0.003 | 0.015  | 0.053  | 0.290 |
| 1.75 | 0.006  | 0.022  | 0.071  | 0.287 |
| 1.78 | -0.010 | 0.000  | 0.062  | 0.288 |
| 1.81 | -0.010 | 0.008  | 0.068  | 0.285 |
| 1.83 | -0.009 | -0.013 | 0.057  | 0.264 |
| 1.86 | -0.006 | -0.001 | 0.060  | 0.267 |
| 1.89 | 0.005  | -0.007 | 0.052  | 0.231 |
| 1.92 | -0.008 | -0.003 | 0.060  | 0.261 |
| 1.94 | 0.003  | 0.002  | 0.034  | 0.254 |
| 1.97 | 0.023  | 0.015  | 0.047  | 0.232 |
| 2.00 | 0.005  | -0.005 | 0.046  | 0.243 |
| 2.03 | -0.007 | -0.004 | 0.048  | 0.226 |
| 2.06 | -0.002 | 0.021  | 0.042  | 0.228 |
| 2.08 | 0.009  | 0.013  | 0.050  | 0.224 |
| 2.11 | 0.006  | 0.011  | 0.042  | 0.219 |
| 2.14 | -0.007 | -0.018 | 0.034  | 0.202 |
| 2.17 | -0.003 | -0.001 | 0.045  | 0.208 |
| 2.19 | 0.008  | -0.008 | 0.051  | 0.197 |
| 2.22 | -0.005 | 0.010  | 0.033  | 0.196 |
| 2.25 | 0.006  | 0.013  | 0.022  | 0.200 |
| 2.28 | -0.007 | -0.004 | 0.019  | 0.197 |
| 2.31 | -0.009 | 0.010  | 0.028  | 0.199 |
| 2.33 | -0.011 | 0.004  | -0.001 | 0.182 |
| 2.36 | -0.010 | 0.003  | 0.013  | 0.165 |
| 2.39 | 0.013  | 0.004  | 0.024  | 0.181 |
| 2.42 | 0.000  | -0.003 | 0.023  | 0.169 |
| 2.44 | 0.000  | -0.009 | 0.010  | 0.150 |
| 2.47 | 0.001  | -0.012 | 0.011  | 0.164 |
| 2.50 | -0.004 | -0.005 | 0.046  | 0.154 |
| 2.53 | -0.005 | -0.003 | 0.007  | 0.157 |
| 2.56 | -0.010 | 0.014  | 0.029  | 0.170 |
| 2.58 | 0.004  | -0.006 | 0.031  | 0.145 |

|      |        |        |        |       |
|------|--------|--------|--------|-------|
| 2.61 | -0.001 | -0.002 | 0.007  | 0.167 |
| 2.64 | 0.002  | 0.001  | 0.024  | 0.145 |
| 2.67 | 0.002  | -0.016 | 0.004  | 0.132 |
| 2.69 | -0.010 | 0.014  | 0.032  | 0.131 |
| 2.72 | 0.009  | -0.003 | -0.004 | 0.127 |
| 2.75 | 0.014  | 0.008  | 0.013  | 0.124 |
| 2.78 | 0.003  | 0.006  | 0.005  | 0.124 |
| 2.81 | 0.010  | 0.001  | 0.000  | 0.112 |
| 2.83 | -0.009 | 0.007  | 0.031  | 0.113 |
| 2.86 | -0.009 | -0.003 | 0.005  | 0.109 |
| 2.89 | -0.003 | -0.003 | 0.013  | 0.120 |
| 2.92 | 0.004  | 0.022  | 0.020  | 0.137 |
| 2.94 | -0.022 | 0.017  | -0.001 | 0.110 |
| 2.97 | 0.004  | 0.011  | 0.013  | 0.091 |
| 3.00 | 0.003  | 0.009  | 0.007  | 0.102 |
| 3.03 | -0.006 | -0.005 | 0.021  | 0.133 |
| 3.06 | -0.020 | 0.010  | 0.007  | 0.110 |
| 3.08 | -0.010 | -0.005 | -0.003 | 0.111 |
| 3.11 | 0.003  | -0.002 | 0.012  | 0.084 |
| 3.14 | 0.015  | 0.015  | -0.041 | 0.093 |
| 3.17 | -0.011 | -0.012 | 0.022  | 0.068 |
| 3.19 | 0.006  | -0.016 | 0.009  | 0.087 |
| 3.22 | -0.002 | -0.012 | 0.005  | 0.085 |
| 3.25 | -0.014 | 0.006  | 0.006  | 0.083 |
| 3.28 | 0.010  | 0.017  | -0.003 | 0.090 |
| 3.31 | -0.007 | -0.017 | -0.004 | 0.068 |
| 3.33 | -0.006 | -0.002 | 0.006  | 0.078 |
| 3.36 | 0.005  | -0.017 | -0.008 | 0.072 |
| 3.39 | -0.018 | -0.008 | -0.005 | 0.079 |
| 3.42 | 0.001  | 0.008  | -0.004 | 0.056 |
| 3.44 | 0.001  | -0.004 | -0.009 | 0.071 |
| 3.47 | 0.017  | 0.006  | -0.010 | 0.088 |
| 3.50 | 0.003  | 0.005  | 0.006  | 0.056 |
| 3.53 | 0.000  | -0.007 | 0.013  | 0.054 |
| 3.56 | 0.016  | -0.013 | -0.007 | 0.072 |
| 3.58 | -0.014 | 0.005  | 0.009  | 0.053 |
| 3.61 | 0.005  | -0.010 | -0.011 | 0.050 |
| 3.64 | 0.006  | -0.019 | 0.006  | 0.054 |
| 3.67 | -0.001 | 0.005  | -0.006 | 0.051 |
| 3.69 | 0.006  | 0.008  | 0.004  | 0.056 |
| 3.72 | -0.003 | -0.008 | 0.008  | 0.047 |
| 3.75 | 0.001  | 0.000  | -0.002 | 0.064 |
| 3.78 | -0.006 | -0.035 | -0.005 | 0.049 |
| 3.81 | -0.005 | -0.004 | -0.008 | 0.056 |
| 3.83 | 0.022  | 0.012  | 0.006  | 0.047 |
| 3.86 | -0.008 | 0.002  | 0.000  | 0.048 |
| 3.89 | 0.019  | 0.016  | -0.003 | 0.055 |
| 3.92 | -0.010 | 0.000  | 0.012  | 0.061 |
| 3.94 | 0.005  | 0.003  | -0.008 | 0.047 |
| 3.97 | 0.029  | -0.003 | 0.002  | 0.037 |

|      |        |        |        |       |
|------|--------|--------|--------|-------|
| 4.00 | -0.012 | -0.003 | -0.011 | 0.046 |
| 4.03 | -0.011 | 0.007  | 0.001  | 0.040 |
| 4.06 | 0.012  | 0.005  | -0.003 | 0.044 |
| 4.08 | 0.000  | 0.011  | -0.002 | 0.057 |
| 4.11 | -0.025 | -0.011 | 0.014  | 0.039 |
| 4.14 | -0.017 | -0.004 | 0.001  | 0.048 |
| 4.17 | -0.008 | 0.006  | -0.005 | 0.044 |
| 4.19 | 0.003  | -0.007 | 0.015  | 0.025 |
| 4.22 | -0.006 | 0.001  | 0.002  | 0.040 |
| 4.25 | 0.000  | -0.017 | 0.000  | 0.018 |
| 4.28 | 0.000  | -0.017 | -0.011 | 0.036 |
| 4.31 | -0.002 | -0.006 | -0.009 | 0.034 |
| 4.33 | 0.003  | -0.002 | -0.001 | 0.056 |
| 4.36 | 0.021  | -0.002 | -0.013 | 0.048 |
| 4.39 | -0.002 | 0.001  | 0.003  | 0.034 |
| 4.42 | -0.008 | -0.004 | -0.010 | 0.019 |
| 4.44 | -0.005 | -0.007 | 0.015  | 0.028 |
| 4.47 | 0.000  | -0.005 | -0.013 | 0.034 |
| 4.50 | 0.001  | -0.005 | 0.013  | 0.036 |
| 4.53 | 0.002  | -0.009 | 0.010  | 0.004 |
| 4.56 | 0.001  | 0.025  | -0.005 | 0.028 |
| 4.58 | 0.006  | 0.013  | -0.005 | 0.008 |
| 4.61 | 0.009  | -0.015 | -0.009 | 0.018 |
| 4.64 | -0.001 | 0.010  | 0.021  | 0.014 |
| 4.67 | -0.008 | -0.001 | 0.000  | 0.022 |
| 4.69 | -0.001 | 0.006  | 0.011  | 0.028 |
| 4.72 | -0.018 | 0.000  | -0.002 | 0.022 |
| 4.75 | -0.014 | 0.003  | 0.003  | 0.034 |
| 4.78 | 0.003  | 0.005  | 0.010  | 0.021 |
| 4.81 | 0.018  | -0.011 | -0.004 | 0.030 |
| 4.83 | 0.008  | -0.017 | 0.000  | 0.016 |
| 4.86 | -0.003 | 0.000  | -0.007 | 0.024 |
| 4.89 | 0.008  | -0.008 | -0.007 | 0.011 |
| 4.92 | -0.008 | -0.016 | 0.014  | 0.019 |
| 4.94 | 0.011  | 0.006  | 0.008  | 0.020 |
| 4.97 | -0.010 | -0.015 | -0.002 | 0.028 |
| 5.00 | -0.006 | 0.003  | -0.009 | 0.013 |
| 5.03 | 0.003  | 0.006  | 0.004  | 0.029 |
| 5.06 | 0.004  | 0.001  | 0.011  | 0.006 |
| 5.08 | -0.009 | 0.007  | 0.008  | 0.016 |
| 5.11 | -0.003 | 0.003  | -0.008 | 0.008 |
| 5.14 | -0.008 | 0.012  | 0.010  | 0.005 |
| 5.17 | -0.001 | 0.000  | -0.010 | 0.011 |
| 5.19 | 0.005  | -0.006 | -0.017 | 0.029 |
| 5.22 | 0.000  | -0.013 | -0.018 | 0.024 |
| 5.25 | 0.011  | -0.010 | 0.006  | 0.024 |
| 5.28 | 0.006  | 0.000  | 0.018  | 0.043 |
| 5.31 | -0.008 | 0.005  | -0.016 | 0.013 |
| 5.33 | -0.001 | 0.010  | -0.010 | 0.011 |
| 5.36 | 0.004  | 0.011  | -0.002 | 0.010 |

|      |        |        |        |        |
|------|--------|--------|--------|--------|
| 5.39 | -0.002 | -0.014 | 0.000  | -0.008 |
| 5.42 | 0.004  | 0.002  | 0.013  | 0.008  |
| 5.44 | -0.009 | -0.008 | 0.011  | 0.024  |
| 5.47 | 0.004  | -0.001 | -0.008 | 0.000  |
| 5.50 | -0.009 | -0.001 | 0.007  | 0.013  |
| 5.53 | 0.009  | 0.000  | -0.017 | 0.013  |
| 5.56 | -0.012 | -0.003 | 0.005  | -0.007 |
| 5.58 | -0.017 | -0.005 | 0.017  | 0.018  |
| 5.61 | 0.003  | -0.011 | -0.007 | 0.026  |
| 5.64 | 0.004  | -0.003 | 0.020  | 0.005  |
| 5.67 | 0.000  | -0.010 | 0.003  | 0.012  |
| 5.69 | -0.008 | 0.000  | -0.003 | 0.020  |
| 5.72 | -0.013 | 0.004  | -0.002 | 0.006  |
| 5.75 | -0.008 | -0.006 | -0.004 | 0.007  |
| 5.78 | 0.023  | -0.015 | -0.002 | 0.004  |
| 5.81 | -0.005 | -0.004 | 0.017  | 0.005  |
| 5.83 | 0.003  | -0.023 | -0.012 | 0.021  |
| 5.86 | -0.021 | 0.007  | 0.014  | 0.023  |
| 5.89 | 0.009  | 0.008  | -0.001 | 0.009  |
| 5.92 | 0.006  | 0.009  | 0.002  | -0.003 |
| 5.94 | 0.005  | -0.007 | -0.005 | 0.033  |
| 5.97 | 0.021  | -0.005 | 0.024  | 0.025  |
| 6.00 | -0.006 | -0.002 | 0.001  | -0.001 |
| 6.03 | 0.004  | -0.013 | 0.011  | 0.004  |
| 6.06 | -0.003 | 0.017  | 0.005  | 0.002  |
| 6.08 | -0.012 | -0.005 | 0.015  | 0.002  |
| 6.11 | 0.021  | -0.001 | -0.004 | 0.002  |
| 6.14 | -0.001 | 0.008  | -0.012 | 0.022  |
| 6.17 | 0.011  | 0.003  | -0.001 | 0.019  |
| 6.19 | 0.002  | -0.012 | 0.002  | 0.005  |
| 6.22 | -0.014 | -0.002 | -0.005 | 0.012  |
| 6.25 | 0.000  | 0.002  | -0.002 | -0.012 |
| 6.28 | 0.008  | -0.031 | 0.004  | 0.012  |
| 6.31 | 0.009  | -0.010 | 0.001  | -0.002 |
| 6.33 | 0.018  | -0.008 | -0.014 | 0.013  |
| 6.36 | 0.002  | 0.002  | 0.005  | 0.007  |
| 6.39 | 0.008  | -0.004 | 0.010  | 0.021  |
| 6.42 | 0.002  | 0.012  | -0.004 | 0.008  |
| 6.44 | -0.012 | 0.014  | -0.010 | 0.000  |
| 6.47 | -0.008 | 0.001  | 0.003  | -0.017 |
| 6.50 | 0.006  | -0.006 | -0.008 | 0.012  |
| 6.53 | 0.017  | -0.006 | -0.002 | 0.013  |
| 6.56 | -0.007 | 0.011  | -0.008 | 0.025  |
| 6.58 | -0.012 | -0.013 | 0.005  | 0.029  |
| 6.61 | -0.001 | 0.001  | 0.003  | -0.001 |
| 6.64 | 0.010  | 0.000  | -0.002 | 0.018  |
| 6.67 | 0.004  | -0.006 | 0.011  | -0.010 |
| 6.69 | 0.006  | 0.004  | 0.008  | 0.011  |
| 6.72 | 0.012  | 0.005  | -0.015 | -0.009 |
| 6.75 | 0.005  | -0.016 | 0.006  | 0.008  |

|      |        |        |        |        |
|------|--------|--------|--------|--------|
| 6.78 | -0.007 | 0.000  | 0.001  | -0.004 |
| 6.81 | -0.012 | -0.018 | -0.002 | 0.001  |
| 6.83 | 0.016  | 0.001  | 0.007  | -0.011 |
| 6.86 | 0.008  | -0.007 | 0.020  | -0.004 |
| 6.89 | 0.005  | 0.009  | -0.003 | 0.014  |
| 6.92 | 0.000  | 0.003  | 0.011  | -0.006 |
| 6.94 | 0.005  | -0.009 | 0.008  | -0.001 |

### 8.2. Figure 2b

| time (h) | [A] (M)<br>([cat] <sub>0</sub> = 0.05 M) | time (h) | [A] (M)<br>([cat] <sub>0</sub> = 0.005 M) |
|----------|------------------------------------------|----------|-------------------------------------------|
| 0.00     | 0.986                                    | 0.00     | 1.001                                     |
| 0.03     | 0.847                                    | 0.69     | 0.650                                     |
| 0.11     | 0.476                                    | 1.64     | 0.323                                     |
| 0.22     | 0.201                                    | 2.94     | 0.110                                     |
| 0.36     | 0.056                                    | 4.28     | 0.036                                     |

### 8.3. Figure 2c

| time (h) | [A] (M)<br>([cat] <sub>0</sub> = 0.05 M) | [A] (M)<br>([cat] <sub>0</sub> = 0.02 M) | [A] (M)<br>([cat] <sub>0</sub> = 0.01 M) | [A] (M)<br>([cat] <sub>0</sub> = 0.005 M) |
|----------|------------------------------------------|------------------------------------------|------------------------------------------|-------------------------------------------|
| 0.00     | 1.037                                    | 1.099                                    | 1.017                                    | 1.057                                     |
| 0.03     | 0.802                                    | 0.969                                    | 1.004                                    | 1.103                                     |
| 0.06     | 0.678                                    | 0.837                                    | 0.944                                    | 0.979                                     |
| 0.08     | 0.648                                    | 0.868                                    | 0.897                                    | 0.889                                     |
| 0.11     | 0.500                                    | 0.712                                    | 0.896                                    | 0.979                                     |
| 0.14     | 0.382                                    | 0.762                                    | 0.827                                    | 0.936                                     |
| 0.17     | 0.224                                    | 0.724                                    | 0.843                                    | 0.853                                     |
| 0.19     | 0.259                                    | 0.611                                    | 0.834                                    | 0.781                                     |
| 0.22     | 0.244                                    | 0.520                                    | 0.709                                    | 0.907                                     |
| 0.25     | 0.129                                    | 0.570                                    | 0.674                                    | 0.870                                     |
| 0.28     | 0.170                                    | 0.446                                    | 0.754                                    | 0.860                                     |
| 0.31     | 0.140                                    | 0.434                                    | 0.633                                    | 0.725                                     |
| 0.33     | 0.127                                    | 0.427                                    | 0.659                                    | 0.803                                     |
| 0.36     | 0.019                                    | 0.372                                    | 0.626                                    | 0.811                                     |
| 0.39     | 0.049                                    | 0.429                                    | 0.622                                    | 0.804                                     |
| 0.42     | 0.018                                    | 0.244                                    | 0.566                                    | 0.786                                     |
| 0.44     | -0.061                                   | 0.224                                    | 0.633                                    | 0.779                                     |
| 0.47     | -0.055                                   | 0.272                                    | 0.466                                    | 0.718                                     |
| 0.50     | 0.102                                    | 0.125                                    | 0.562                                    | 0.714                                     |
| 0.53     | -0.021                                   | 0.185                                    | 0.507                                    | 0.726                                     |
| 0.56     | 0.011                                    | 0.243                                    | 0.512                                    | 0.693                                     |
| 0.58     | -0.023                                   | 0.161                                    | 0.321                                    | 0.751                                     |
| 0.61     | -0.029                                   | 0.228                                    | 0.412                                    | 0.734                                     |
| 0.64     | 0.013                                    | 0.133                                    | 0.457                                    | 0.640                                     |
| 0.67     | -0.026                                   | 0.141                                    | 0.442                                    | 0.667                                     |
| 0.69     | 0.003                                    | 0.182                                    | 0.417                                    | 0.608                                     |

|      |        |        |        |       |
|------|--------|--------|--------|-------|
| 0.72 | 0.061  | 0.049  | 0.346  | 0.582 |
| 0.75 | -0.038 | 0.076  | 0.347  | 0.641 |
| 0.78 | -0.038 | 0.073  | 0.356  | 0.497 |
| 0.81 | 0.055  | 0.084  | 0.325  | 0.622 |
| 0.83 | -0.017 | -0.016 | 0.285  | 0.565 |
| 0.86 | -0.099 | 0.142  | 0.390  | 0.553 |
| 0.89 | 0.029  | 0.156  | 0.358  | 0.548 |
| 0.92 | 0.022  | -0.002 | 0.369  | 0.588 |
| 0.94 | -0.028 | 0.056  | 0.224  | 0.522 |
| 0.97 | 0.040  | -0.026 | 0.211  | 0.567 |
| 1.00 | 0.028  | 0.080  | 0.158  | 0.522 |
| 1.03 | 0.013  | -0.017 | 0.270  | 0.536 |
| 1.06 | 0.074  | 0.121  | 0.264  | 0.423 |
| 1.08 | 0.063  | 0.053  | 0.190  | 0.427 |
| 1.11 | 0.010  | 0.024  | 0.211  | 0.466 |
| 1.14 | 0.091  | 0.035  | 0.232  | 0.480 |
| 1.17 | 0.000  | 0.064  | 0.251  | 0.478 |
| 1.19 | -0.035 | 0.023  | 0.048  | 0.472 |
| 1.22 | -0.012 | -0.028 | 0.150  | 0.550 |
| 1.25 | -0.065 | 0.084  | 0.098  | 0.362 |
| 1.28 | 0.087  | -0.002 | 0.152  | 0.454 |
| 1.31 | 0.064  | -0.022 | 0.124  | 0.392 |
| 1.33 | -0.095 | -0.047 | 0.142  | 0.419 |
| 1.36 | -0.018 | 0.023  | 0.031  | 0.393 |
| 1.39 | 0.098  | 0.071  | 0.133  | 0.293 |
| 1.42 | -0.057 | -0.017 | 0.042  | 0.377 |
| 1.44 | 0.045  | -0.003 | 0.128  | 0.356 |
| 1.47 | -0.029 | 0.017  | 0.143  | 0.421 |
| 1.50 | 0.053  | -0.008 | 0.114  | 0.341 |
| 1.53 | -0.032 | 0.014  | 0.166  | 0.274 |
| 1.56 | 0.017  | -0.066 | 0.049  | 0.283 |
| 1.58 | 0.016  | 0.033  | 0.086  | 0.355 |
| 1.61 | -0.003 | 0.009  | 0.129  | 0.245 |
| 1.64 | -0.078 | 0.054  | 0.107  | 0.298 |
| 1.67 | 0.049  | -0.008 | 0.020  | 0.375 |
| 1.69 | 0.081  | -0.009 | 0.011  | 0.423 |
| 1.72 | 0.035  | 0.081  | 0.078  | 0.323 |
| 1.75 | 0.065  | 0.065  | 0.031  | 0.329 |
| 1.78 | -0.018 | 0.037  | -0.016 | 0.298 |
| 1.81 | -0.042 | 0.069  | 0.040  | 0.371 |
| 1.83 | 0.078  | -0.018 | 0.054  | 0.286 |
| 1.86 | -0.044 | 0.058  | 0.008  | 0.257 |
| 1.89 | -0.014 | 0.028  | 0.134  | 0.308 |
| 1.92 | 0.066  | -0.013 | -0.020 | 0.312 |
| 1.94 | -0.024 | 0.021  | 0.106  | 0.201 |
| 1.97 | -0.013 | 0.061  | 0.057  | 0.246 |
| 2.00 | 0.115  | -0.003 | 0.056  | 0.241 |
| 2.03 | 0.008  | 0.050  | 0.023  | 0.244 |
| 2.06 | -0.049 | -0.076 | 0.115  | 0.129 |
| 2.08 | -0.006 | 0.007  | 0.021  | 0.138 |

|      |        |        |        |        |
|------|--------|--------|--------|--------|
| 2.11 | 0.071  | 0.011  | 0.017  | 0.256  |
| 2.14 | -0.013 | -0.020 | 0.064  | 0.218  |
| 2.17 | 0.023  | 0.009  | -0.007 | 0.216  |
| 2.19 | 0.058  | 0.032  | -0.001 | 0.184  |
| 2.22 | 0.057  | 0.006  | -0.001 | 0.272  |
| 2.25 | -0.047 | 0.076  | 0.052  | 0.219  |
| 2.28 | -0.109 | -0.074 | -0.012 | 0.205  |
| 2.31 | -0.013 | 0.044  | 0.035  | 0.248  |
| 2.33 | 0.002  | -0.022 | 0.070  | 0.097  |
| 2.36 | 0.004  | 0.060  | 0.076  | 0.195  |
| 2.39 | 0.047  | 0.060  | 0.077  | 0.110  |
| 2.42 | -0.012 | -0.022 | -0.008 | 0.240  |
| 2.44 | 0.023  | 0.024  | 0.013  | 0.188  |
| 2.47 | 0.018  | -0.136 | 0.052  | 0.199  |
| 2.50 | -0.025 | 0.026  | 0.089  | 0.180  |
| 2.53 | 0.022  | 0.000  | 0.039  | 0.145  |
| 2.56 | 0.047  | 0.021  | 0.045  | 0.087  |
| 2.58 | 0.053  | -0.020 | 0.097  | 0.084  |
| 2.61 | 0.036  | -0.033 | 0.054  | 0.123  |
| 2.64 | -0.066 | -0.025 | -0.050 | 0.215  |
| 2.67 | 0.029  | 0.104  | 0.052  | 0.077  |
| 2.69 | -0.022 | -0.040 | -0.018 | 0.241  |
| 2.72 | 0.074  | -0.052 | -0.029 | 0.084  |
| 2.75 | 0.012  | -0.017 | 0.004  | 0.117  |
| 2.78 | 0.050  | 0.032  | 0.073  | 0.070  |
| 2.81 | 0.038  | 0.039  | -0.009 | 0.205  |
| 2.83 | -0.003 | 0.018  | -0.064 | 0.138  |
| 2.86 | -0.008 | -0.110 | 0.031  | 0.175  |
| 2.89 | -0.002 | 0.051  | -0.014 | 0.123  |
| 2.92 | -0.030 | 0.057  | -0.003 | 0.074  |
| 2.94 | -0.020 | 0.012  | -0.016 | 0.152  |
| 2.97 | -0.013 | 0.001  | 0.098  | 0.132  |
| 3.00 | 0.004  | 0.075  | -0.037 | 0.085  |
| 3.03 | 0.050  | 0.073  | 0.083  | 0.091  |
| 3.06 | 0.019  | -0.047 | -0.004 | 0.168  |
| 3.08 | 0.029  | -0.032 | -0.089 | 0.187  |
| 3.11 | 0.020  | 0.036  | 0.009  | 0.117  |
| 3.14 | -0.043 | 0.048  | -0.032 | 0.148  |
| 3.17 | -0.045 | 0.107  | 0.000  | -0.021 |
| 3.19 | -0.002 | -0.020 | -0.046 | 0.100  |
| 3.22 | 0.091  | 0.061  | -0.009 | 0.077  |
| 3.25 | 0.007  | -0.017 | 0.007  | 0.074  |
| 3.28 | -0.031 | 0.006  | -0.029 | 0.067  |
| 3.31 | -0.086 | 0.036  | 0.027  | 0.088  |
| 3.33 | -0.041 | -0.061 | 0.016  | 0.097  |
| 3.36 | -0.040 | -0.053 | 0.101  | -0.038 |
| 3.39 | 0.034  | 0.040  | 0.031  | 0.027  |
| 3.42 | 0.003  | 0.016  | 0.039  | 0.010  |
| 3.44 | 0.001  | 0.060  | -0.073 | 0.089  |
| 3.47 | 0.018  | 0.060  | -0.028 | 0.051  |

|      |        |        |        |        |
|------|--------|--------|--------|--------|
| 3.50 | 0.028  | 0.065  | 0.018  | -0.022 |
| 3.53 | 0.060  | -0.020 | -0.033 | 0.056  |
| 3.56 | 0.000  | 0.044  | 0.006  | 0.014  |
| 3.58 | 0.038  | -0.036 | -0.031 | 0.022  |
| 3.61 | -0.010 | 0.034  | 0.035  | 0.073  |
| 3.64 | 0.008  | 0.068  | -0.027 | 0.022  |
| 3.67 | 0.053  | 0.053  | -0.016 | 0.090  |
| 3.69 | 0.020  | 0.099  | 0.050  | 0.022  |
| 3.72 | -0.015 | -0.114 | -0.012 | 0.078  |
| 3.75 | -0.035 | -0.027 | -0.003 | 0.130  |
| 3.78 | 0.012  | -0.037 | 0.050  | 0.104  |
| 3.81 | -0.037 | -0.003 | 0.026  | 0.049  |
| 3.83 | -0.056 | -0.078 | 0.107  | 0.005  |
| 3.86 | 0.057  | 0.018  | 0.028  | -0.007 |
| 3.89 | -0.049 | 0.004  | -0.110 | 0.077  |
| 3.92 | -0.030 | -0.031 | 0.054  | 0.107  |
| 3.94 | 0.045  | 0.024  | 0.048  | 0.052  |
| 3.97 | -0.008 | 0.047  | 0.039  | -0.035 |
| 4.00 | 0.031  | 0.095  | 0.103  | 0.053  |
| 4.03 | 0.017  | 0.014  | 0.062  | -0.045 |
| 4.06 | -0.018 | -0.084 | -0.043 | 0.092  |
| 4.08 | 0.034  | -0.009 | 0.069  | 0.079  |
| 4.11 | 0.018  | -0.018 | -0.009 | 0.016  |
| 4.14 | -0.038 | -0.068 | 0.084  | 0.090  |
| 4.17 | 0.022  | 0.021  | 0.027  | 0.091  |
| 4.19 | 0.020  | 0.119  | -0.081 | -0.050 |
| 4.22 | 0.038  | 0.053  | -0.011 | -0.074 |
| 4.25 | 0.003  | 0.132  | 0.018  | 0.039  |
| 4.28 | -0.010 | 0.036  | -0.012 | 0.106  |
| 4.31 | 0.011  | 0.062  | 0.051  | 0.094  |
| 4.33 | 0.004  | 0.035  | 0.007  | 0.014  |
| 4.36 | -0.033 | -0.014 | 0.068  | -0.020 |
| 4.39 | 0.013  | -0.004 | 0.035  | 0.154  |
| 4.42 | 0.053  | 0.030  | -0.085 | -0.013 |
| 4.44 | 0.038  | 0.048  | -0.009 | 0.039  |
| 4.47 | -0.072 | -0.012 | -0.021 | 0.013  |
| 4.50 | 0.010  | 0.043  | 0.024  | 0.085  |
| 4.53 | -0.014 | -0.019 | 0.104  | -0.033 |
| 4.56 | -0.001 | -0.007 | 0.070  | 0.003  |
| 4.58 | 0.075  | 0.028  | -0.026 | -0.005 |
| 4.61 | -0.037 | 0.075  | 0.015  | -0.003 |
| 4.64 | -0.074 | 0.016  | -0.022 | -0.019 |
| 4.67 | -0.005 | 0.018  | -0.042 | -0.029 |
| 4.69 | 0.009  | 0.060  | 0.070  | 0.001  |
| 4.72 | -0.029 | 0.081  | 0.098  | 0.094  |
| 4.75 | 0.007  | 0.134  | 0.058  | 0.039  |
| 4.78 | -0.074 | 0.064  | 0.014  | 0.002  |
| 4.81 | 0.022  | 0.020  | -0.020 | 0.014  |
| 4.83 | -0.003 | 0.033  | 0.024  | 0.061  |
| 4.86 | -0.071 | 0.063  | 0.047  | 0.012  |



|      |        |        |        |        |
|------|--------|--------|--------|--------|
| 4.89 | -0.029 | 0.010  | -0.008 | -0.069 |
| 4.92 | 0.034  | 0.008  | -0.022 | 0.018  |
| 4.94 | -0.027 | 0.025  | 0.050  | 0.076  |
| 4.97 | 0.026  | 0.035  | -0.018 | -0.018 |
| 5.00 | 0.098  | -0.044 | 0.041  | 0.010  |
| 5.03 | -0.007 | 0.042  | 0.008  | 0.027  |
| 5.06 | -0.077 | -0.011 | 0.071  | 0.001  |
| 5.08 | -0.138 | -0.012 | -0.007 | 0.145  |
| 5.11 | 0.000  | 0.028  | 0.084  | -0.012 |
| 5.14 | -0.020 | 0.044  | 0.026  | 0.052  |
| 5.17 | 0.047  | 0.057  | -0.021 | 0.111  |
| 5.19 | 0.034  | 0.026  | -0.025 | 0.045  |
| 5.22 | -0.072 | -0.010 | 0.053  | 0.071  |
| 5.25 | 0.125  | -0.065 | 0.035  | 0.074  |
| 5.28 | -0.010 | -0.007 | -0.114 | 0.019  |
| 5.31 | -0.066 | -0.021 | 0.073  | -0.046 |
| 5.33 | -0.094 | -0.075 | 0.063  | 0.060  |
| 5.36 | -0.019 | -0.039 | 0.044  | 0.074  |
| 5.39 | -0.030 | -0.049 | -0.042 | 0.016  |
| 5.42 | 0.154  | 0.088  | -0.037 | -0.023 |
| 5.44 | -0.059 | 0.057  | 0.071  | 0.031  |
| 5.47 | -0.006 | 0.006  | 0.024  | -0.058 |
| 5.50 | 0.088  | -0.008 | -0.099 | 0.023  |
| 5.53 | 0.025  | -0.014 | -0.049 | -0.078 |
| 5.56 | 0.007  | 0.021  | -0.058 | -0.051 |
| 5.58 | -0.008 | -0.004 | -0.058 | 0.066  |
| 5.61 | -0.030 | -0.020 | -0.025 | -0.050 |
| 5.64 | -0.114 | 0.014  | -0.042 | -0.091 |
| 5.67 | -0.039 | -0.075 | 0.040  | 0.053  |
| 5.69 | 0.065  | 0.045  | -0.039 | -0.074 |
| 5.72 | 0.026  | -0.089 | -0.058 | 0.033  |
| 5.75 | 0.070  | -0.013 | -0.055 | -0.070 |
| 5.78 | 0.024  | -0.007 | -0.044 | 0.040  |
| 5.81 | -0.067 | 0.038  | 0.064  | -0.074 |
| 5.83 | -0.051 | -0.060 | -0.142 | -0.003 |
| 5.86 | -0.008 | -0.011 | -0.004 | 0.009  |
| 5.89 | 0.021  | -0.049 | -0.025 | 0.026  |
| 5.92 | 0.036  | 0.015  | -0.031 | 0.042  |
| 5.94 | 0.076  | 0.064  | -0.047 | -0.089 |
| 5.97 | 0.097  | 0.047  | -0.019 | 0.093  |
| 6.00 | 0.094  | 0.047  | -0.083 | 0.019  |
| 6.03 | 0.038  | -0.041 | -0.025 | 0.022  |
| 6.06 | 0.038  | 0.035  | -0.007 | -0.018 |
| 6.08 | -0.045 | 0.008  | -0.003 | -0.003 |
| 6.11 | -0.016 | -0.029 | 0.011  | 0.029  |
| 6.14 | 0.018  | -0.098 | -0.063 | 0.109  |
| 6.17 | 0.024  | 0.043  | 0.152  | 0.022  |
| 6.19 | 0.014  | -0.024 | -0.014 | -0.063 |
| 6.22 | 0.024  | -0.131 | -0.023 | 0.016  |
| 6.25 | -0.018 | -0.021 | 0.063  | 0.027  |

|      |        |        |        |        |
|------|--------|--------|--------|--------|
| 6.28 | 0.017  | -0.081 | -0.082 | 0.019  |
| 6.31 | -0.024 | -0.004 | 0.018  | 0.059  |
| 6.33 | 0.016  | 0.004  | -0.013 | 0.015  |
| 6.36 | 0.007  | 0.084  | -0.012 | 0.040  |
| 6.39 | -0.034 | -0.102 | 0.057  | 0.036  |
| 6.42 | 0.008  | 0.000  | 0.034  | -0.083 |
| 6.44 | -0.027 | 0.050  | -0.075 | 0.025  |
| 6.47 | 0.041  | -0.005 | 0.032  | -0.012 |
| 6.50 | 0.001  | 0.102  | 0.071  | -0.024 |
| 6.53 | -0.137 | 0.015  | -0.005 | -0.058 |
| 6.56 | -0.030 | -0.012 | 0.040  | -0.002 |
| 6.58 | 0.086  | 0.056  | 0.059  | -0.065 |
| 6.61 | 0.078  | -0.048 | -0.047 | -0.007 |
| 6.64 | 0.086  | 0.051  | -0.048 | -0.012 |
| 6.67 | 0.002  | -0.004 | 0.073  | 0.039  |
| 6.69 | -0.062 | -0.014 | 0.011  | -0.014 |
| 6.72 | -0.105 | -0.021 | -0.004 | -0.018 |
| 6.75 | 0.026  | 0.043  | 0.000  | 0.011  |
| 6.78 | 0.055  | 0.019  | 0.117  | -0.027 |
| 6.81 | 0.038  | -0.064 | 0.102  | -0.054 |
| 6.83 | -0.004 | -0.003 | -0.027 | 0.006  |
| 6.86 | -0.087 | 0.036  | 0.126  | 0.012  |
| 6.89 | 0.122  | -0.028 | -0.078 | 0.009  |
| 6.92 | 0.043  | -0.013 | -0.009 | 0.082  |
| 6.94 | -0.033 | -0.056 | 0.019  | -0.054 |

#### 8.4. Figure 3

| time (h) | [A] (M)<br>([cat] <sub>0</sub> = 0.0308 M) | [A] (M)<br>([cat] <sub>0</sub> = 0.02185 M) | [A] (M)<br>([cat] <sub>0</sub> = 0.0155 M) |
|----------|--------------------------------------------|---------------------------------------------|--------------------------------------------|
| 0.00     | 3.625                                      | 3.625                                       | 3.625                                      |
| 0.56     | 1.509                                      | 2.381                                       | 2.950                                      |
| 1.11     | 0.554                                      | 1.500                                       | 2.375                                      |
| 1.67     | 0.193                                      | 0.915                                       | 1.891                                      |
| 2.22     | 0.066                                      | 0.546                                       | 1.491                                      |
| 2.78     | 0.022                                      | 0.322                                       | 1.166                                      |
| 3.33     | 0.008                                      | 0.189                                       | 0.906                                      |
| 3.89     | 0.003                                      | 0.110                                       | 0.700                                      |
| 4.44     | 0.001                                      | 0.064                                       | 0.539                                      |
| 5.00     | 0.000                                      | 0.037                                       | 0.413                                      |
| 5.56     | 0.000                                      | 0.022                                       | 0.316                                      |
| 6.11     | 0.000                                      | 0.013                                       | 0.242                                      |
| 6.67     | 0.000                                      | 0.007                                       | 0.184                                      |
| 7.22     | 0.000                                      | 0.004                                       | 0.141                                      |
| 7.78     | 0.000                                      | 0.002                                       | 0.107                                      |
| 8.33     | 0.000                                      | 0.001                                       | 0.081                                      |
| 8.89     | 0.000                                      | 0.001                                       | 0.062                                      |
| 9.44     | 0.000                                      | 0.000                                       | 0.047                                      |
| 10.00    | 0.000                                      | 0.000                                       | 0.036                                      |

|       |       |       |       |
|-------|-------|-------|-------|
| 10.56 | 0.000 | 0.000 | 0.027 |
| 11.11 | 0.000 | 0.000 | 0.021 |
| 11.67 | 0.000 | 0.000 | 0.016 |
| 12.22 | 0.000 | 0.000 | 0.012 |
| 12.78 | 0.000 | 0.000 | 0.009 |
| 13.33 | 0.000 | 0.000 | 0.007 |
| 13.89 | 0.000 | 0.000 | 0.005 |

### 8.5. Figure 4b

| time (h) | [A] (M)<br>([cat] <sub>0</sub> = 2·10 <sup>-5</sup> M) | [A] (M)<br>([cat] <sub>0</sub> = 1.5·10 <sup>-5</sup> M) | [A] (M)<br>([cat] <sub>0</sub> = 10 <sup>-5</sup> M) |
|----------|--------------------------------------------------------|----------------------------------------------------------|------------------------------------------------------|
| 0        | 0.200                                                  | 0.200                                                    | 0.200                                                |
| 175      | 0.165                                                  | 0.171                                                    | 0.179                                                |
| 350      | 0.134                                                  | 0.146                                                    | 0.159                                                |
| 525      | 0.107                                                  | 0.123                                                    | 0.141                                                |
| 700      | 0.084                                                  | 0.102                                                    | 0.125                                                |
| 875      | 0.064                                                  | 0.084                                                    | 0.109                                                |
| 1050     | 0.046                                                  | 0.067                                                    | 0.095                                                |
| 1225     | 0.031                                                  | 0.052                                                    | 0.082                                                |
| 1400     | 0.018                                                  | 0.039                                                    | 0.070                                                |
| 1575     | 0.008                                                  | 0.028                                                    | 0.059                                                |
| 1750     | 0.001                                                  | 0.018                                                    | 0.049                                                |
| 1925     | 0.000                                                  | 0.009                                                    | 0.040                                                |
| 2100     | 0.000                                                  | 0.003                                                    | 0.031                                                |
| 2275     | 0.000                                                  | 0.001                                                    | 0.024                                                |
| 2450     | 0.000                                                  | 0.000                                                    | 0.017                                                |
| 2625     | 0.000                                                  | 0.000                                                    | 0.011                                                |
| 2800     | 0.000                                                  | 0.000                                                    | 0.006                                                |
| 2975     | 0.000                                                  | 0.000                                                    | 0.002                                                |
| 3150     | 0.000                                                  | 0.000                                                    | 0.001                                                |
| 3325     | 0.000                                                  | 0.000                                                    | 0.000                                                |
| 3500     | 0.000                                                  | 0.000                                                    | 0.000                                                |

| time (h) | [A] (M)<br>([cat] <sub>0</sub> = 2·10 <sup>-3</sup> M) | [A] (M)<br>([cat] <sub>0</sub> = 1.5·10 <sup>-3</sup> M) | [A] (M)<br>([cat] <sub>0</sub> = 10 <sup>-3</sup> M) |
|----------|--------------------------------------------------------|----------------------------------------------------------|------------------------------------------------------|
| 0        | 0.200                                                  | 0.200                                                    | 0.200                                                |
| 6        | 0.186                                                  | 0.188                                                    | 0.190                                                |
| 18       | 0.162                                                  | 0.168                                                    | 0.174                                                |
| 30       | 0.141                                                  | 0.149                                                    | 0.159                                                |
| 42       | 0.122                                                  | 0.132                                                    | 0.144                                                |
| 54       | 0.104                                                  | 0.116                                                    | 0.131                                                |
| 66       | 0.088                                                  | 0.101                                                    | 0.118                                                |
| 78       | 0.073                                                  | 0.087                                                    | 0.106                                                |
| 90       | 0.060                                                  | 0.075                                                    | 0.095                                                |
| 102      | 0.047                                                  | 0.063                                                    | 0.084                                                |
| 114      | 0.036                                                  | 0.052                                                    | 0.074                                                |
| 126      | 0.026                                                  | 0.043                                                    | 0.065                                                |

|     |       |       |       |
|-----|-------|-------|-------|
| 138 | 0.017 | 0.033 | 0.056 |
| 150 | 0.009 | 0.025 | 0.048 |
| 162 | 0.002 | 0.017 | 0.040 |
| 174 | 0.000 | 0.010 | 0.033 |
| 186 | 0.000 | 0.004 | 0.027 |
| 198 | 0.000 | 0.000 | 0.020 |
| 210 | 0.000 | 0.000 | 0.014 |
| 222 | 0.000 | 0.000 | 0.009 |
| 234 | 0.000 | 0.000 | 0.004 |
| 246 | 0.000 | 0.000 | 0.001 |
| 258 | 0.000 | 0.000 | 0.000 |
| 270 | 0.000 | 0.000 | 0.000 |
| 282 | 0.000 | 0.000 | 0.000 |
| 300 | 0.000 | 0.000 | 0.000 |
